# Supplementary material
Source: PubMed Central journal article supplement (PMC3697715)
Supplement: JCM.00999-13_zjm999092626so1.pdf [file JCM.00999-13_zjm999092626so1.pdf]

Table S1. Phylogroup distribution and antimicrobial susceptibility of amoxicillin-clavulanate-resistant *E. coli* according to the mechanism of resistance. Data are expressed as percentage of isolates (95% confidence interval) except where specified.

|                                            | All cases<br>(n=212) | HPen<br>(n=54) | IRT<br>(n=43) | c-AmpC<br>(n=40) | p-AmpC<br>(n=40) | OXA-1<br>(n=35) |
|--------------------------------------------|----------------------|----------------|---------------|------------------|------------------|-----------------|
| Phylogroup:                                |                      |                |               |                  |                  |                 |
| A <sup>a</sup>                             | 30 (24-37)           | 17 (9-29)      | 16 (8-30)     | 40 (26-55)       | 12 (5-26)        | 77 (61-88)      |
| B1 <sup>a</sup>                            | 13 (9-18)            | 2 (0-9)        | 14 (6-27)     | 27 (16-43)       | 20 (10-35)       | 3 (0-14)        |
| B2 <sup>a</sup>                            | 40 (33-46)           | 52 (39-65)     | 56 (41-69)    | 20 (10-35)       | 50 (35-65)       | 11 (4-26)       |
| D <sup>a</sup>                             | 17 (13-23)           | 30 (19-43)     | 14 (6-27)     | 12 (5-26)        | 17 (9-32)        | 8 (3-22)        |
| Susceptibility to:                         |                      |                |               |                  |                  |                 |
| Piperacillin-tazobactam                    | 61 (54-67)           | 24 (15-37)     | 77 (62-87)    | 90 (77-96)       | 92 (80-97)       | 29 (16-45)      |
| Cefotaxime                                 | 68 (62-74)           | 100 (93-100)   | 100 (92-100)  | 35 (22-50)       | 7 (2-20)         | 89 (74-95)      |
| Ceftazidime                                | 73 (67-79)           | 98 (90-100)    | 100 (92-100)  | 45 (31-60)       | 15 (7-29)        | 100 (90-100)    |
| Cefepime                                   | 98 (94-99)           | 98 (90-100)    | 100 (92-100)  | 95 (83-99)       | 98 (87-99)       | 97 (85-99)      |
| Ertapenem                                  | 98 (96-99)           | 98 (90-100)    | 100 (92-100)  | 98 (87-99)       | 98 (87-99)       | 100 (90-100)    |
| Imipenem                                   | 99 (97-100)          | 98 (90-100)    | 100 (92-100)  | 100 (91-100)     | 100 (91-100)     | 100 (90-100)    |
| Ciprofloxacin <sup>a</sup>                 | 47 (40-54)           | 50 (37-63)     | 65 (50-77)    | 52 (37-67)       | 50 (35-65)       | 11 (4-26)       |
| Gentamicin <sup>a</sup>                    | 77 (71-82)           | 87 (75-93)     | 91 (78-96)    | 98 (87-99)       | 72 (57-84)       | 26 (14-42)      |
| Tobramycin <sup>a</sup>                    | 74 (68-80)           | 81 (69-90)     | 91 (78-96)    | 95 (83-99)       | 77 (62-88)       | 17 (8-33)       |
| Amikacin <sup>a</sup>                      | 98 (96-99)           | 100 (93-100)   | 100 (92-100)  | 100 (91-100)     | 100 (91-100)     | 91 (78-97)      |
| Trimethoprim-sulfamethoxazole <sup>a</sup> | 47 (40-53)           | 50 (37-63)     | 46 (32-61)    | 60 (45-74)       | 60 (45-74)       | 11 (4-26)       |
| Multidrug-resistant isolates               | 88 (83-92)           | 93(82-97)      | 67 (52-79)    | 82 (68-91)       | 100 (91-100)     | 100 (90-100)    |
| Median resistance score (IQR)              | 2 (1-3)              | 2 (1-3)        | 1 (0-2)       | 1.5 (1-3)        | 2 (1-3)          | 4 (3-4)         |

HPen: TEM-1 or SHV-1 hyperproducer. IRT: inhibitor resistant TEM producer. c-AmpC: chromosomal AmpC hyperproducer. p-AmpC: plasmidic AmpC producer. OXA-1: OXA-1 producer.

<sup>a</sup>Data previously published for the whole collection of 252 AMC-resistant isolates; here only the data for the 212 isolates included in this analysis are provided.

Table S2. Multivariate analysis of variables associated with urinary tract infection and bacteremia among amoxicillin-clavulanate acid resistant *E. coli*.

| Variable                                 | Adjusted OR (95% CI) | P value |
|------------------------------------------|----------------------|---------|
| <b>Model for urinary tract infection</b> |                      |         |
| Nosocomial acquisition                   | 0.07 (0.03-0.16)     | <0.001  |
| Age >65 years                            | 2.23 (1.08-4.60)     | 0.03    |
| B2 phylogroup                            | 2.35 (1.09-5.04)     | 0.02    |
| IRT production                           | 2.47 (0.93-6.53)     | 0.06    |
| OXA-1 production                         | 4.89 (1.52-15.71)    | 0.008   |
| <b>Model for bacteremia</b>              |                      |         |
| Nosocomial acquisition                   | 8.86 (2.27-32.70)    | 0.002   |
| Chromosomal AmpC hyperproduction         | 5.88 (1.58-20.00)    | 0.008   |
| OXA-1 production                         | 4.00 (0.99-16.12)    | 0.05    |
